# Supplementary material for: Highly-accurate solvent identification using dynamic evaporation reflection spectra from an inverse opal sensor combined with a deep learning model
Source: Royal Society of Chemistry journal article supplement (doi:10.1039/d3nr02807k), 2023-01-01
Supplement: d3nr02807k1.pdf [file d3nr02807k1.pdf]

## Highly-accurate solvent identification using dynamic volatilization reflection spectra from an inverse opal sensor combined with a deep learning model

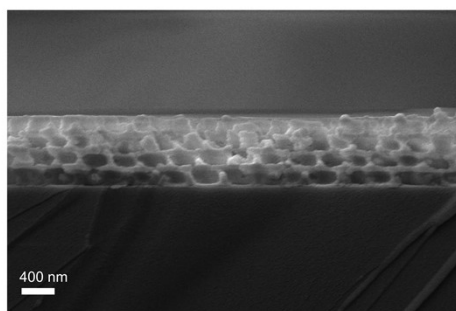

Figure S1. SEM image of the side view of the IO.

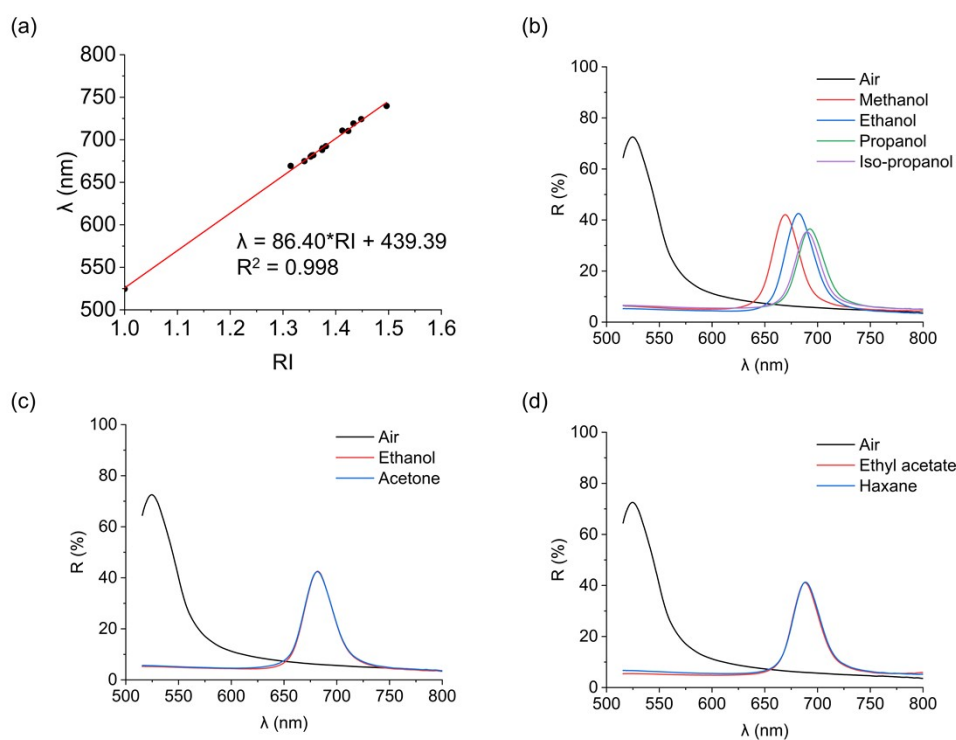

Figure S2. SRS detection of different solvents. (a) The change in reflection wavelength with the solvent RI. The red line represents the least squares fit of the data. (b) SRS detection of solvents with different RIs, including methanol (RI = 1.3145), ethanol (RI = 1.3575), iso-propanol (RI = 1.3750), and propanol (RI = 1.3814). (c) and (d) SRS detection of solvents with similar RIs, such as ethanol (RI = 1.3575) compared with acetone (RI = 1.3547) and ethyl acetate (RI = 1.3743) compared with hexane (RI = 1.3741).

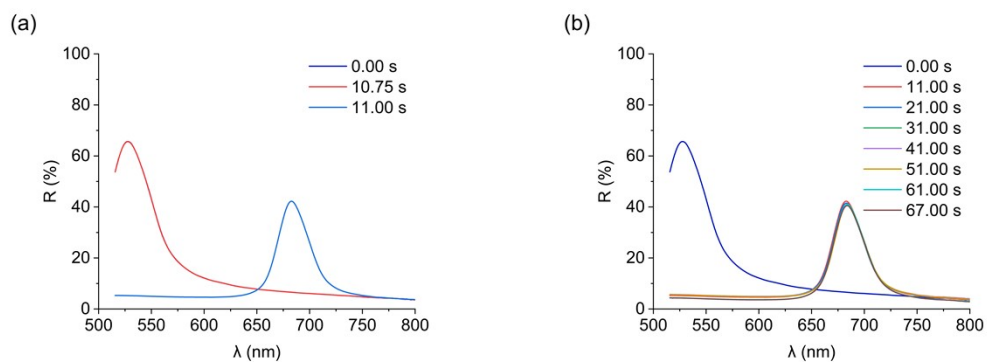

Figure S3 Evolution of the reflection spectrum of the IO during ethanol volatilization. (a) Phase I. The spectrum at 0.00 and 10.75 s are completely overlapping. (b) Phase II. The solvent is added to the IO at the 11<sup>th</sup> second.

Table S1. Composition information and partitioning of the DERS dataset.

| Solvents           | Number of Data Set |            |              |
|--------------------|--------------------|------------|--------------|
|                    | Training Set       | Test Set   | All Data Set |
| Dichloromethane    | 49                 | 21         | 70           |
| Trichloromethane   | 49                 | 21         | 70           |
| Tetrachloromethane | 49                 | 21         | 70           |
| Methanol           | 49                 | 21         | 69           |
| Ethanol            | 49                 | 21         | 70           |
| Iso-propanol       | 49                 | 21         | 70           |
| Propanol           | 50                 | 21         | 71           |
| Cyclohexane        | 49                 | 21         | 70           |
| Hexane             | 49                 | 21         | 70           |
| Ether              | 49                 | 21         | 70           |
| Ethyl acetate      | 50                 | 22         | 72           |
| Acetonitrile       | 49                 | 21         | 70           |
| Acetone            | 50                 | 22         | 72           |
| Toluene            | 50                 | 21         | 71           |
| <b>Total</b>       | <b>689</b>         | <b>296</b> | <b>985</b>   |

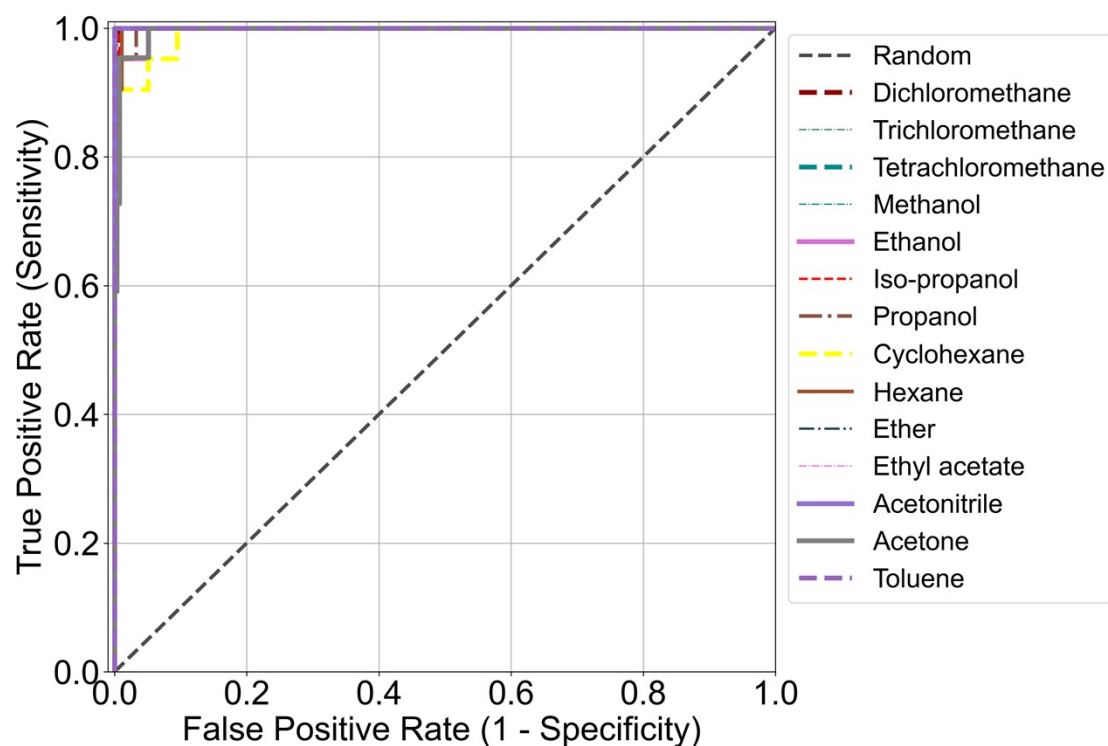

Figure S4. ROC curve of XGBoost on the test set.

Table S2. Classification performance of XGBoost for various solvents in the test set, with precision, recall, F1-Score, Accuracy, and ROC-AUC metrics used to evaluate the model.

| Solvents           | Precision | Recall | F1-Score | Accuracy | ROC-AUC | Support |
|--------------------|-----------|--------|----------|----------|---------|---------|
| Dichloromethane    | 0.8400    | 1.0000 | 0.9130   | 1.0000   | 0.9977  | 21      |
| Trichloromethane   | 1.0000    | 0.9524 | 0.9756   | 0.9524   | 1.0000  | 21      |
| Tetrachloromethane | 1.0000    | 0.9524 | 0.9756   | 0.9524   | 1.0000  | 21      |
| Methanol           | 1.0000    | 0.9524 | 0.9756   | 0.9524   | 1.0000  | 21      |
| Ethanol            | 0.9091    | 0.9524 | 0.9302   | 0.9524   | 0.9974  | 21      |
| Iso-propanol       | 0.9130    | 1.0000 | 0.9545   | 1.0000   | 0.9988  | 21      |
| Propanol           | 1.0000    | 0.9048 | 0.9500   | 0.9048   | 0.9981  | 21      |
| Cyclohexane        | 1.0000    | 0.9048 | 0.9500   | 0.9048   | 0.9931  | 21      |
| Hexane             | 0.9048    | 0.9048 | 0.9048   | 0.9048   | 0.9986  | 21      |
| Ether              | 0.9545    | 1.0000 | 0.9767   | 1.0000   | 0.9998  | 21      |
| Ethyl acetate      | 0.8462    | 1.0000 | 0.9167   | 1.0000   | 0.9998  | 22      |
| Acetonitrile       | 0.9545    | 1.0000 | 0.9767   | 1.0000   | 1.0000  | 21      |
| Acetone            | 0.9375    | 0.6818 | 0.7895   | 0.6818   | 0.9955  | 22      |
| Toluene            | 1.0000    | 1.0000 | 1.0000   | 1.0000   | 1.0000  | 21      |
| Macro avg          | 0.9471    | 0.9433 | 0.9421   | 0.9433   | 0.9985  | 296     |
| Weighted avg       | 0.9467    | 0.9426 | 0.9415   | 0.9426   | 0.9985  | 296     |

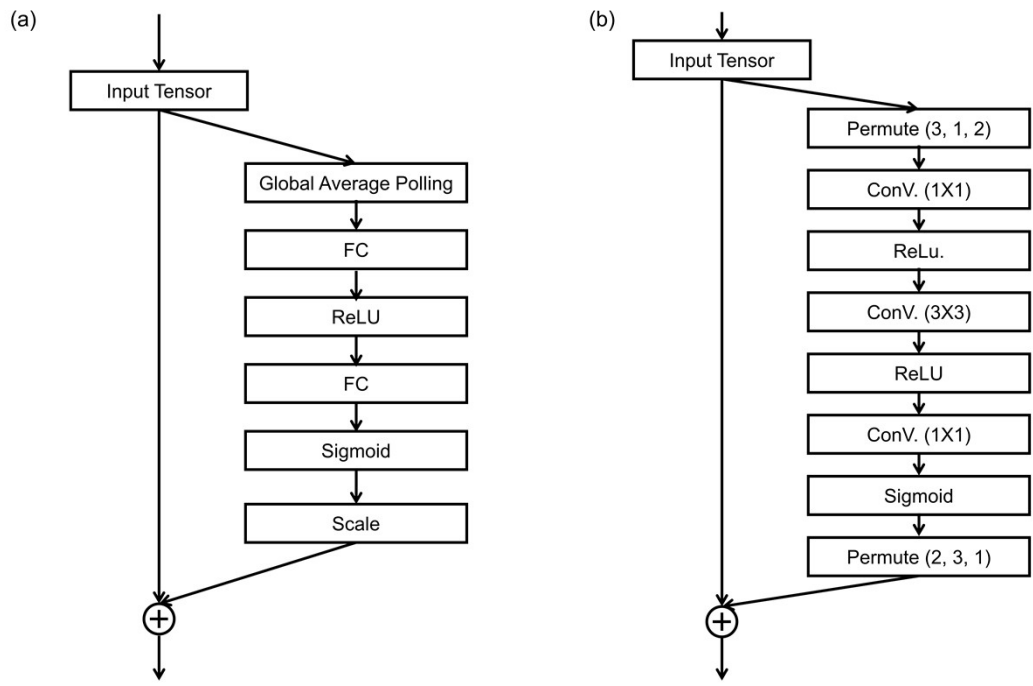

Figure S5. Schematic diagram of the channel attention mechanism module (a) and spatial attention mechanism module (b).

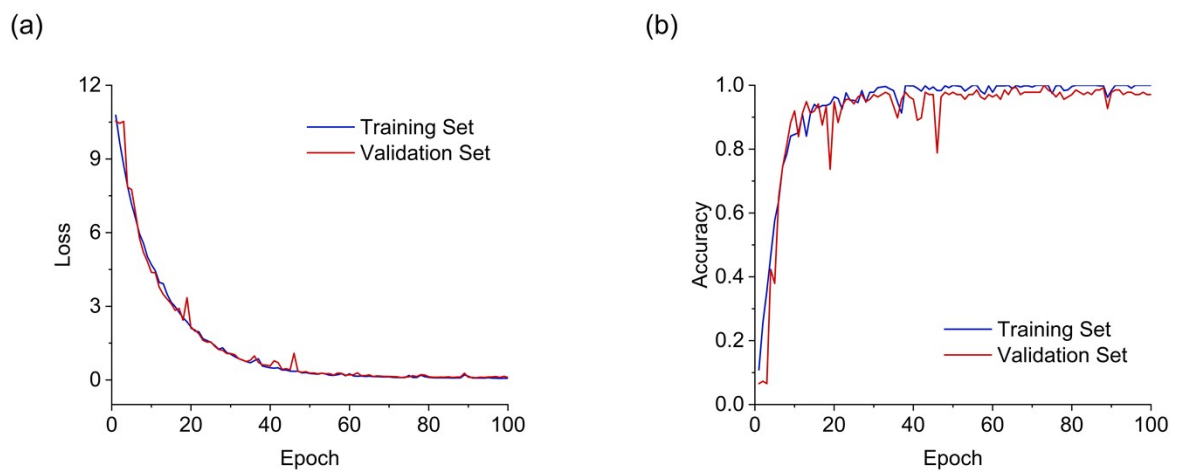

Figure S6. Loss (a) and accuracy (b) during the training process of Resnet18-CBAM.

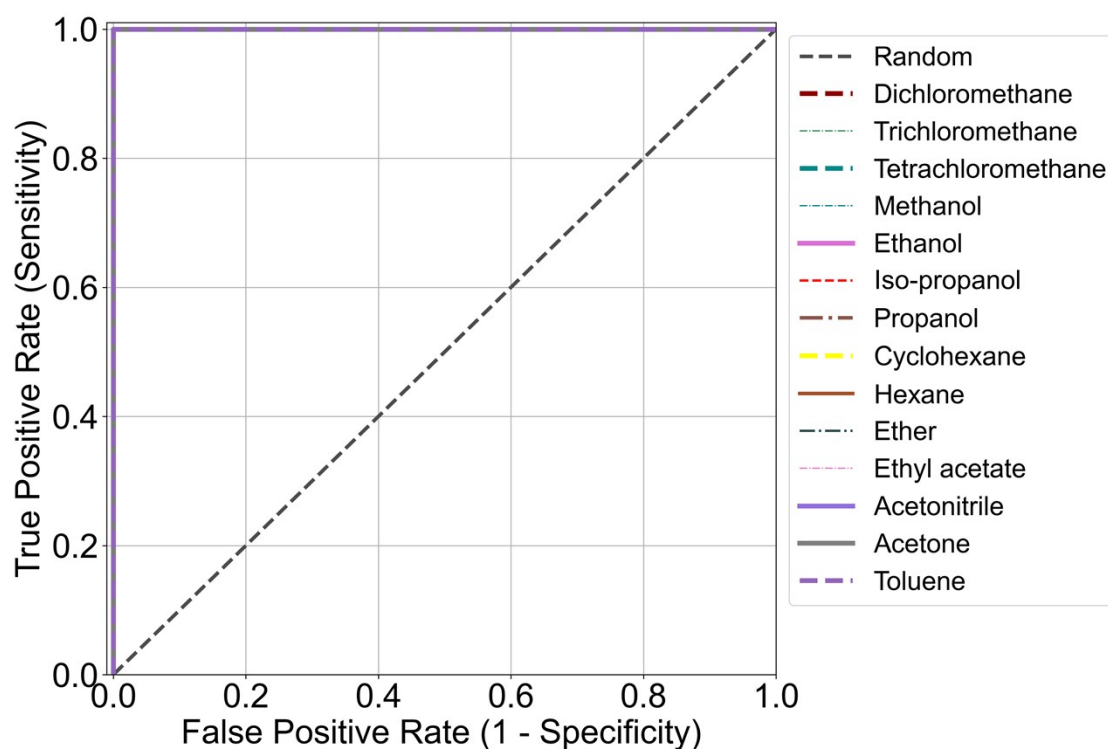

Figure S7. ROC curve of Resnet18-CBAM on the test set.

Table S3. Classification accuracy and F1-Score of various machine learning models and deep learning models on the test set.

| Model                                       | ACC          | F1-Score     |
|---------------------------------------------|--------------|--------------|
| LR                                          | 0.706        | 0.694        |
| DT                                          | 0.889        | 0.889        |
| KNN                                         | 0.946        | 0.945        |
| MLP                                         | 0.905        | 0.902        |
| GaussianNB                                  | 0.909        | 0.908        |
| SVM                                         | 0.926        | 0.926        |
| RF                                          | 0.922        | 0.922        |
| XGBoost                                     | 0.943        | 0.942        |
| <hr style="border-top: 1px dashed black;"/> |              |              |
| 7-layer CNN                                 | 0.959        | 0.959        |
| Resnet18                                    | 0.980        | 0.980        |
| <b>Resnet18-CBAM</b>                        | <b>1.000</b> | <b>1.000</b> |
